# Supplementary material for: Exploring the Role of Desmoplastic Physical Stroma in Pancreatic Cancer Progression Using a Three-Dimensional Collagen Matrix Model
Source: MDPI journal article supplement (doi:10.3390/bioengineering10121437), 2023-12-18
Supplement: s1 [file s1]

Table S1. Gene ontologies with the top 5 highest *p*-values of biological process in Collagen-Capan-1 model

| GOID       | Term                                                                 | Count | p-value  | Genes symbol                                                                                                                                                                                                                                                  |
|------------|----------------------------------------------------------------------|-------|----------|---------------------------------------------------------------------------------------------------------------------------------------------------------------------------------------------------------------------------------------------------------------|
| GO:0007165 | signal transduction                                                  | 37    | 0.008926 | FBN2, ECM1, CXCL8, PDE1A, C5AR1, ADM, FGF1, NDRG1, RND1, AKAP12, IL1RL1, RASD1, RASSF10, INPP5D, TNFRSF8, SFN, RALGDS, IGFBP1, MAP2K3, FGFBP1, CCL22, TNFSF14, OSGIN1, GAB3, MCC, RHOD, GEM, GREM1, NR4A3, TAFA3, IL1B, GNB4, PKP1, HCLS1, RIN1, ASB2, TRIM55 |
| GO:0045944 | positive regulation of transcription from RNA polymerase II promoter | 36    | 0.006002 | CSRNP1, DLX2, FGF1, ETS1, RELB, SERTAD1, MYC, ZNF544, KDM6B, OSR2, MIR9-1HG, EGR2, EGR3, JAG1, EGR4, RFX2, NFATC2, BHLHA15, ARID3B, MAFA, BMP6, DCN, GREM1, FOSL1, BMP2, IL6, GAL, NR4A3, MAFB, IL1B, DDIT3, FOSB, HCLS1, ATF3, PPARD, ENG                    |
| GO:0008284 | positive regulation of cell proliferation                            | 28    | 2.76E-06 | CSF2, PDGFB, PDGFA, ADM, CRIP2, FGF1, THBS1, AREG, PTHLH, SERTAD1, MYC, IL6R, OSR2, PDGFRA, EDN2, EGR4, BMP6, GREM1, FOSL1, BMP2, IL6, IL1B, CLCF1, SPDYA, HCLS1, CD248, ATF3, CRLF2                                                                          |
| GO:0000122 | negative regulation of transcription from RNA polymerase II promoter | 27    | 0.04943  | DLX2, NOTCH4, NRARP, BACH2, MYC, SFN, HES2, OSR2, PLK3, MSX2, NFATC2, DKK1, BMP6, BMP2, NR4A3, MAFB, DDIT3, ZNF439, SNAI1, CRY1, FOSB, HCLS1, SNAI2, MAFK, ATF3, PPARD, ENG                                                                                   |
| GO:0010628 | positive regulation of gene expression                               | 25    | 3.06E-05 | CSF2, CXCL8, PDGFB, FGF1, ETS1, ACTG1, RELB, CDH5, MYC, LMNA, OSR2, NFATC2, DKK1, BMP6, ADAM19, SFRP4, BMP2, IL6, IL1B, TMEM119, PKP1, VIM, ATF3, PPARD, ENG                                                                                                  |

Table S2. Gene ontologies with the top 5 lowest *p*-values of biological process in Collagen-Capan-1 model

| GOID       | Term                                                                 | Count | p-value  | Genes symbol                                                                                                                                                                                                                                                                                                                                                                 |
|------------|----------------------------------------------------------------------|-------|----------|------------------------------------------------------------------------------------------------------------------------------------------------------------------------------------------------------------------------------------------------------------------------------------------------------------------------------------------------------------------------------|
| GO:0006357 | regulation of transcription from RNA polymerase II promoter          | 52    | 1.17E-06 | ZNF892, MESP2, CSRNP3, RORC, HOXA13, MECOM, TRPS1, HOXA7, PITX2, HOXA6, SOX7, ZNF763, HOXA5, ZNF443, MEF2C, EBF2, ARID5B, PAX6, ETV2, ZNF75D, ISL1, FOXP2, RUNX2, TOX3, NR5A2, FOXD4L6, ZNF519, IRF2, HOXB3, HOXB8, ZFPM2, KDM7A, HOXB5, ZNF792, DLX1, TSHZ1, ZFP14, PRDM16, HOXC5, ZNF345, BCL11B, BICRAL, POU6F2, NR2F1, MEIS2, NFATC4, BCL6, NFIB, TLX2, ZNF737, JMY, SP5 |
| GO:0045944 | positive regulation of transcription from RNA polymerase II promoter | 36    | 1.32E-04 | DLX1, CSRNP3, GATA5, HOXA13, SOX2, MECOM, PRDM16, MYB, HOXA7, PITX2, ZNF345, HOXA5, NCOA2, MEF2C, BCL11B, NR2F1, EBF2, TET1, PAX6, ETV2, ISL1, MEIS2, RUNX2, RGMA, NFATC4, TOX3, NR5A2, NFIB, TLX2, IRF2, TLR9, HOXB3, RARB, MAML3, ZFPM2, HOXB5                                                                                                                             |
| GO:0000122 | negative regulation of transcription from RNA polymerase II promoter | 33    | 3.79E-05 | DLX1, RORC, GATA5, SOX2, TRPS1, PRDM16, MYB, HOXA7, PITX2, ZNF345, NCOA2, SKOR1, MEF2C, SEMA4D, PTCH1, NR2F1, TET1, ARID5B, PAX6, ISL1, NR0B2, MEIS2, FOXP2, H1-3, NFATC4, BCL6, NFIB, IRF2, SP5, HOXB3, RARB, HOXB8, ZFPM2                                                                                                                                                  |
| GO:0007155 | cell adhesion                                                        | 23    | 3.47E-05 | ENTPD1, PCDHGB6, VCAM1, SEMA4D, PCDH9, PCDHGA4, FAM24B-CUZD1, PCDH20, PCDHGC3, PCDHGA1, PCDHB11, PCDHGA9, SELP, ISLR, PCDHB6, CASS4, MXRA8, APBA1, CNTN3, SVEP1, PCDHB3, CD34, FREM2                                                                                                                                                                                         |
| GO:0006355 | regulation of transcription, DNA-templated                           | 23    | 0.047321 | NCOA2, SKOR1, MEF2C, HCG_1984214, POU6F2, EBF2, PAX6, ZNF75D, MEIS2, RUNX2, SOX2, ZFP14, NR5A2, ZNF618, ZNF519, ZNF737, IRF2, MYB, RARB, PITX2, ZNF763, SOX7, ZNF443                                                                                                                                                                                                         |
